# Supplementary material for: Synthesis of calcium carbonate microcapsules as self-healing containers
Source: Royal Society of Chemistry journal article supplement (doi:10.1039/c9ra03804c), 2019-01-01
Supplement: c9ra03804c1.pdf [file c9ra03804c1.pdf]

## Supporting Information

### Synthesize of Calcium Carbonate Microcapsules as Self-Healing Containers

Nadeesha Maduwanthi Hettiarachchi,<sup>a</sup> Rangika Thilan De Silva,<sup>a,b\*</sup> M.M.M.G. Prasanga Gayanath Mantilaka,<sup>a,b</sup> Pooria Pasbakhsh,<sup>c</sup> K.M. Nalin De Silva,<sup>a,b,d</sup> and Gehan A. J. Amaratunga<sup>a,b,e</sup>

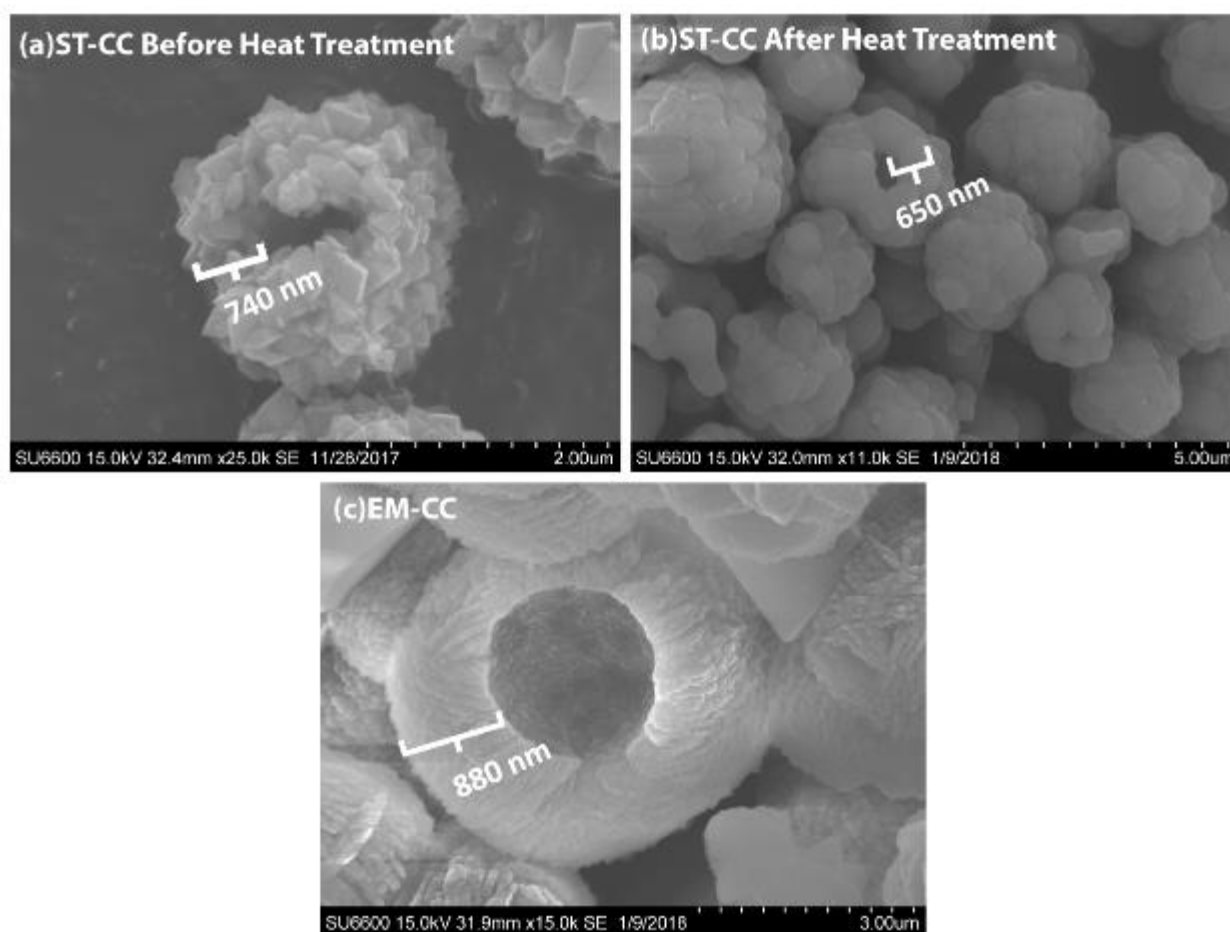

**Figure S1:** The images of broken ST-CC hollow MCC microcapsules which used to measure coating thickness before heat treatment (a), after heat treatment (b), and broken EM-CC microcapsules which used to measure coating thickness (c).

Epoxy polymer (ARALDITE 506) -  $^{13}\text{C}$  NMR

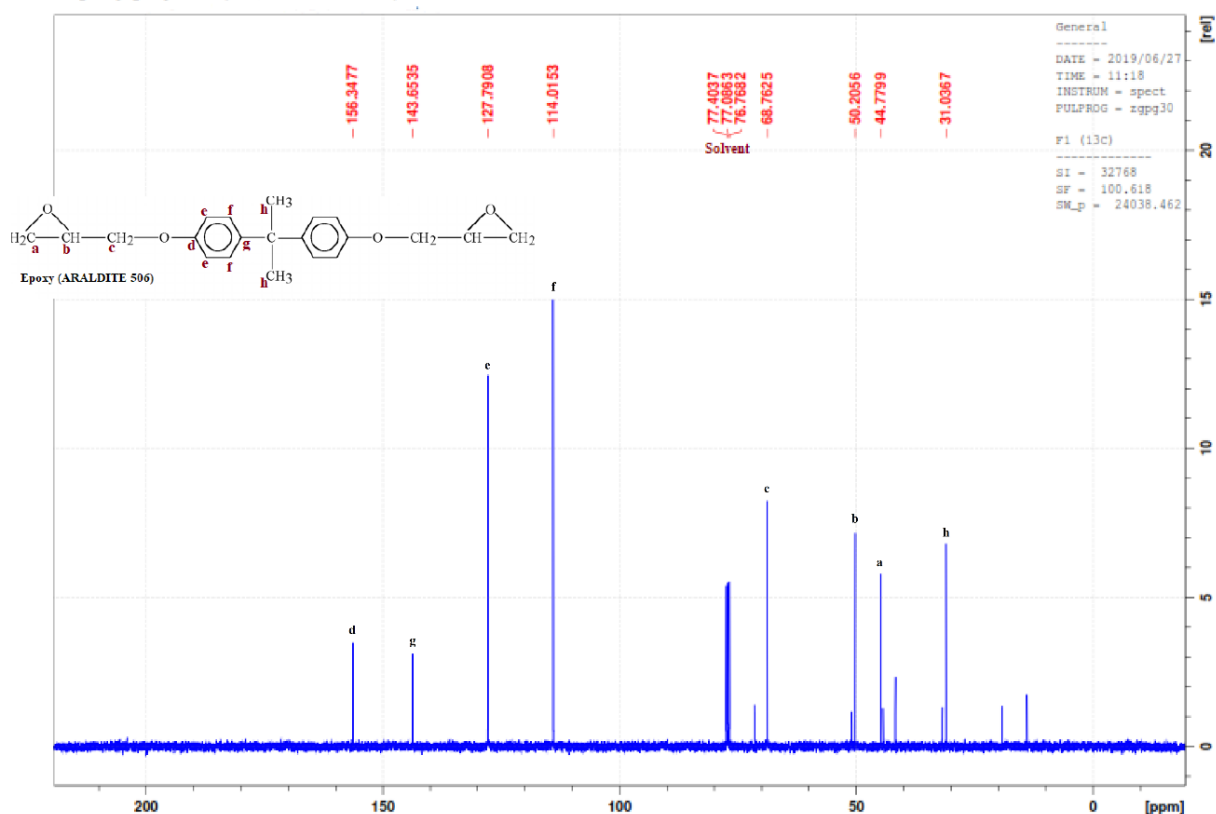

Figure S<sub>2</sub>(a): The  $^{13}\text{C}$  NMR spectrum of EPX polymer (ARALDITE 506) In the  $\text{CDCl}_3$  solvent which denoted the spins corresponding to EPX material.

Epoxy (ARALDITE 506) $^{13}\text{C}$  NMR DEPT135

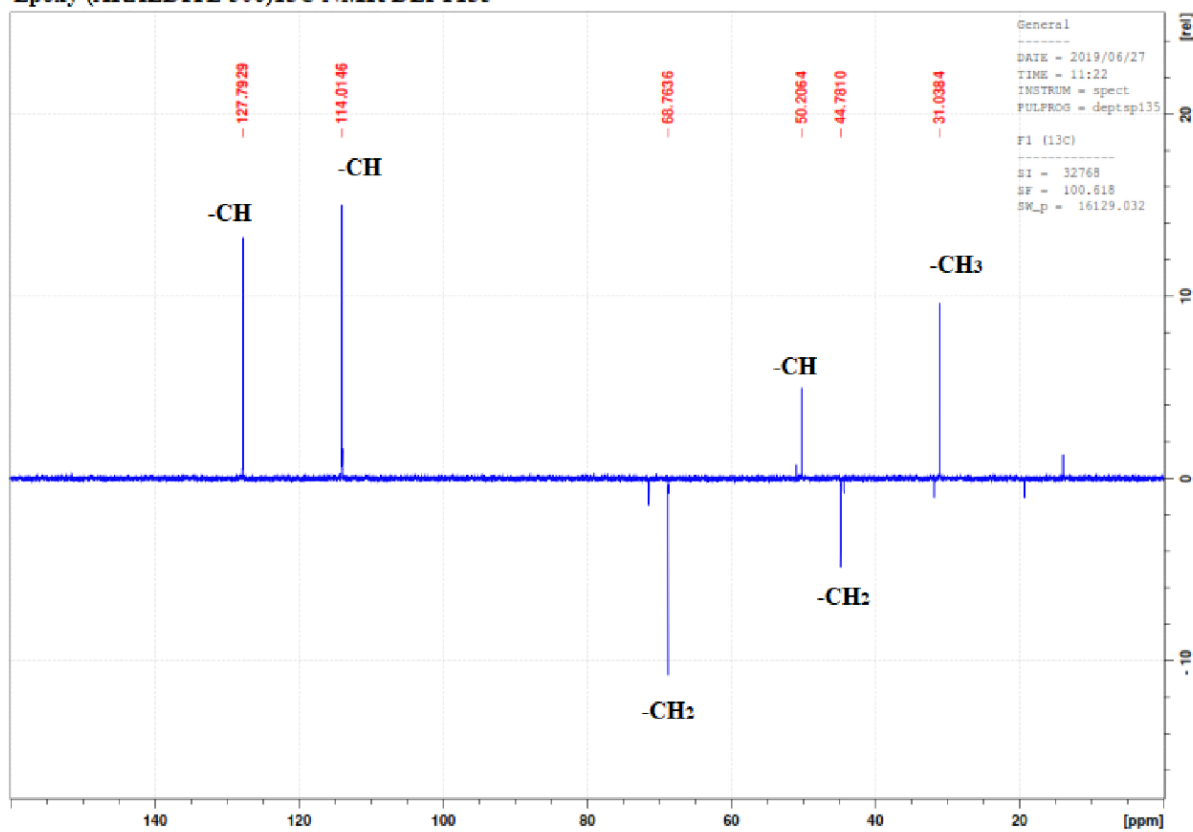

Figure S<sub>2</sub>(b): The  $^{13}\text{C}$  NMR DEPT 135 spectrum of EPX polymer (ARALDITE 506) In the  $\text{CDCl}_3$  solvent.

### Epoxy encapsulated EM-CC microcapsules

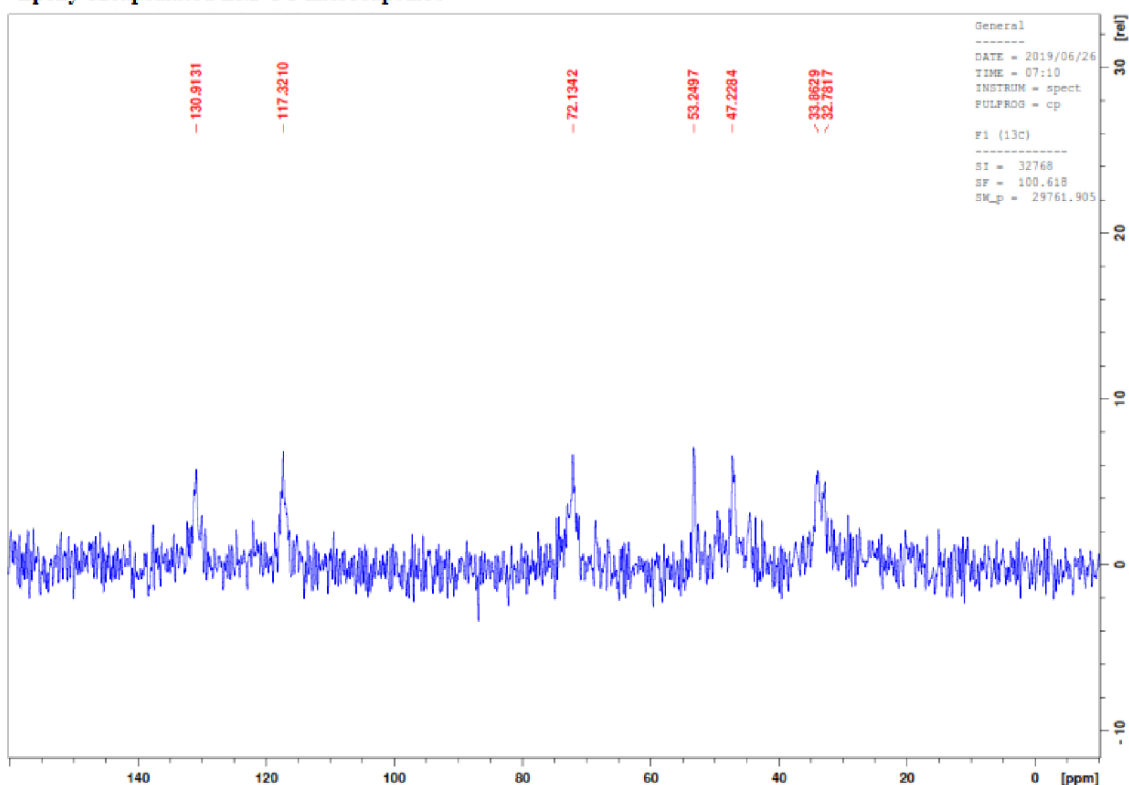

**Figure S<sub>3</sub>:** The <sup>13</sup>C solid NMR spectrum of EPX polymer (ARALDITE 506) encapsulated EM-CC microcapsules (all marks denoted the similar spins which corresponding to same encapsulated EPX material).

### Epoxy encapsulated ST-CC microcapsules

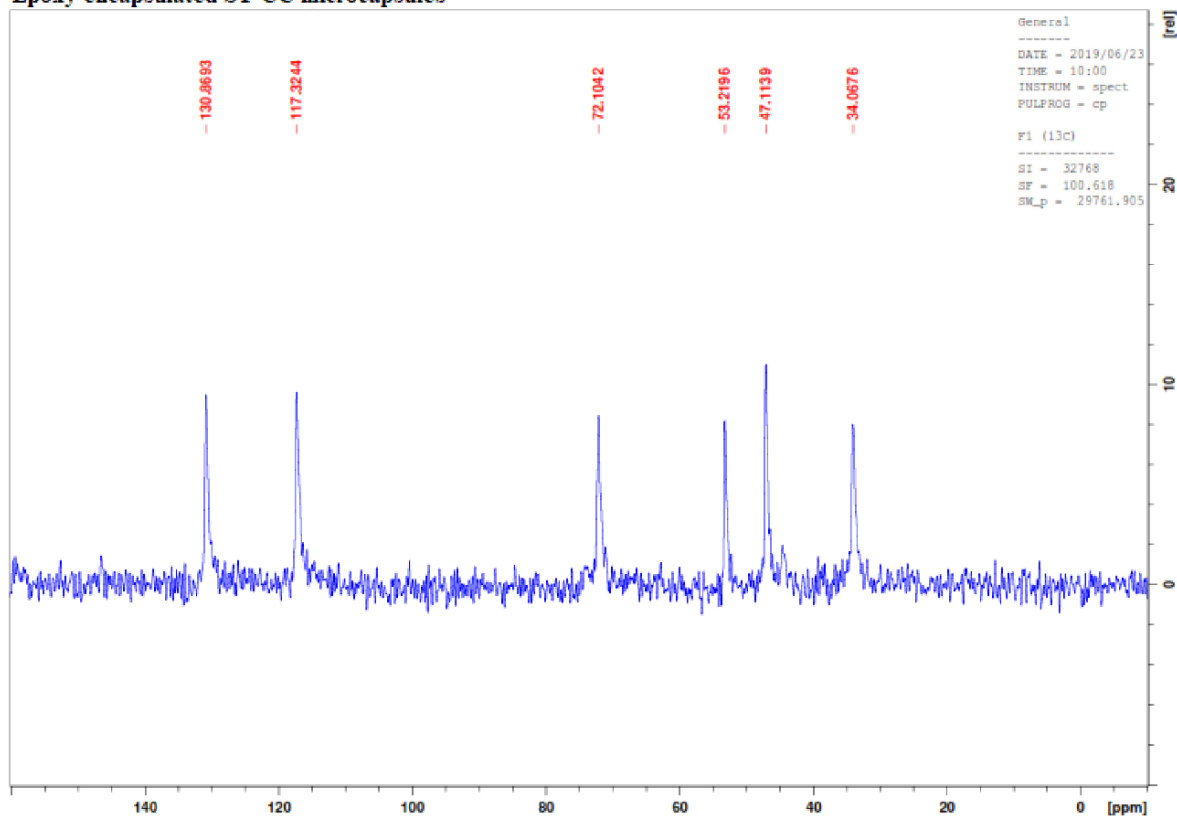

**Figure S<sub>4</sub>:** The <sup>13</sup>C solid NMR spectrum of EPX polymer (ARALDITE 506) encapsulated ST-CC microcapsules (all marks denoted the similar spins which corresponding to same encapsulated EPX material).

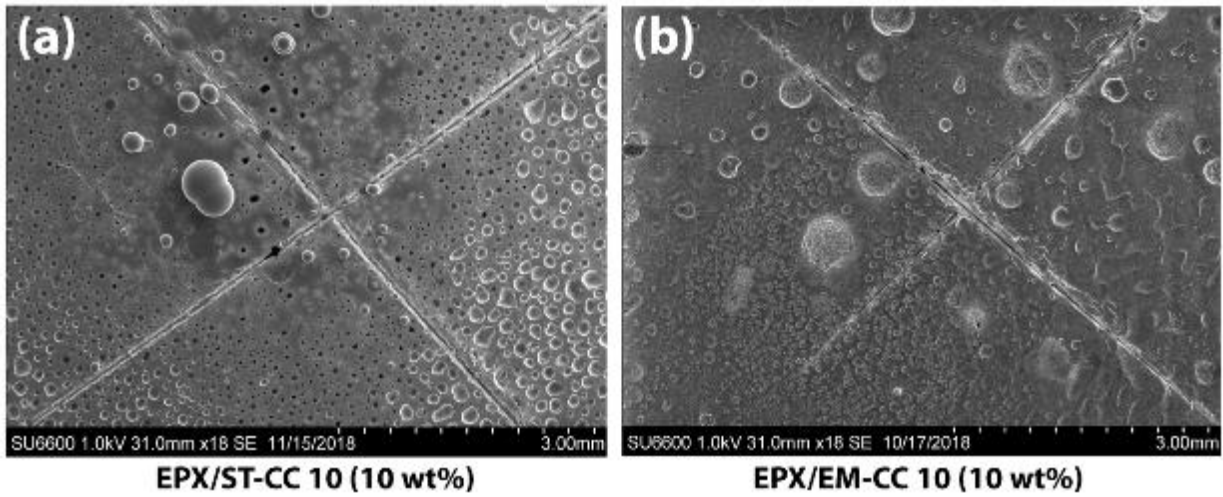

**Figure S5:** The scratch test on the EPX composite coatings on metal substrate (a) EPX/ST-CC10 and (b) EPX/EM-CC10 after 24 h from scratching with sharp object.

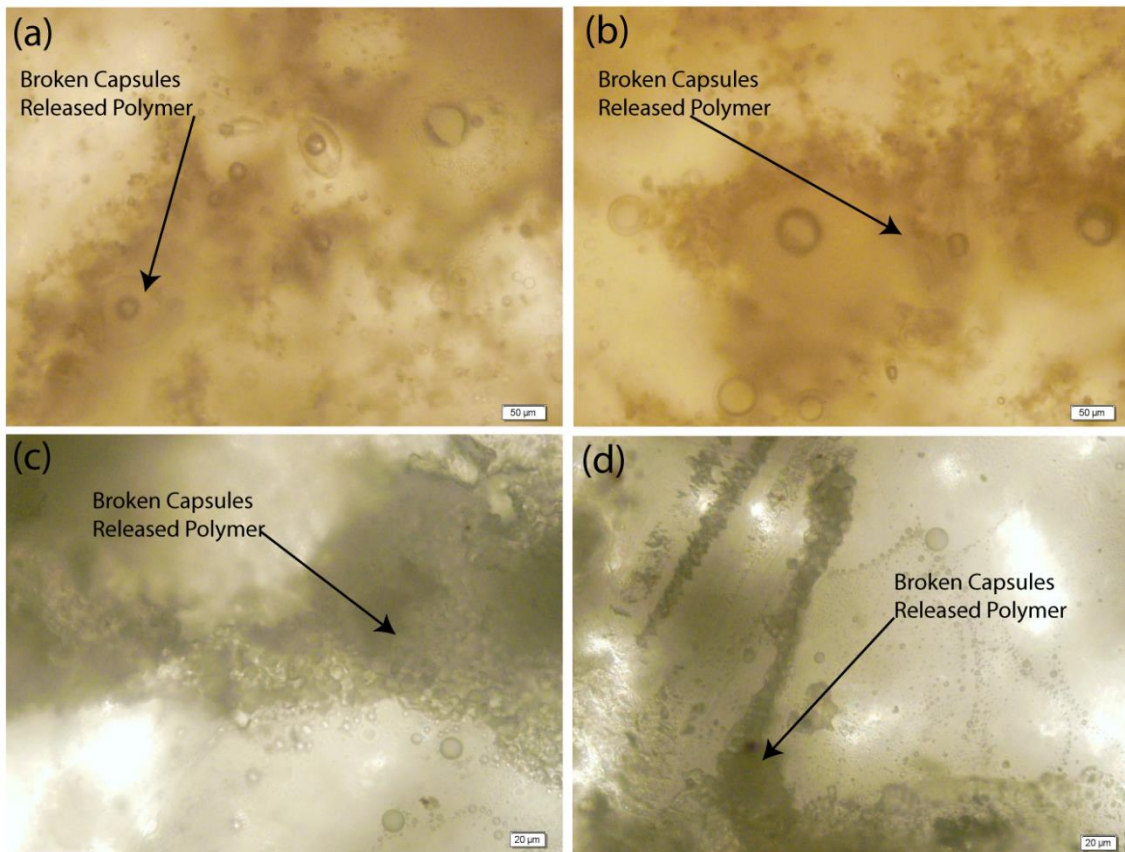

**Figure S6:** The LMC images of (a-b) EPX/ST-CC 20 and (c-d) EPX/EM-CC 20 which thin composites coatings to confirm the releasing of encapsulated EPX after scratching with sharp object.

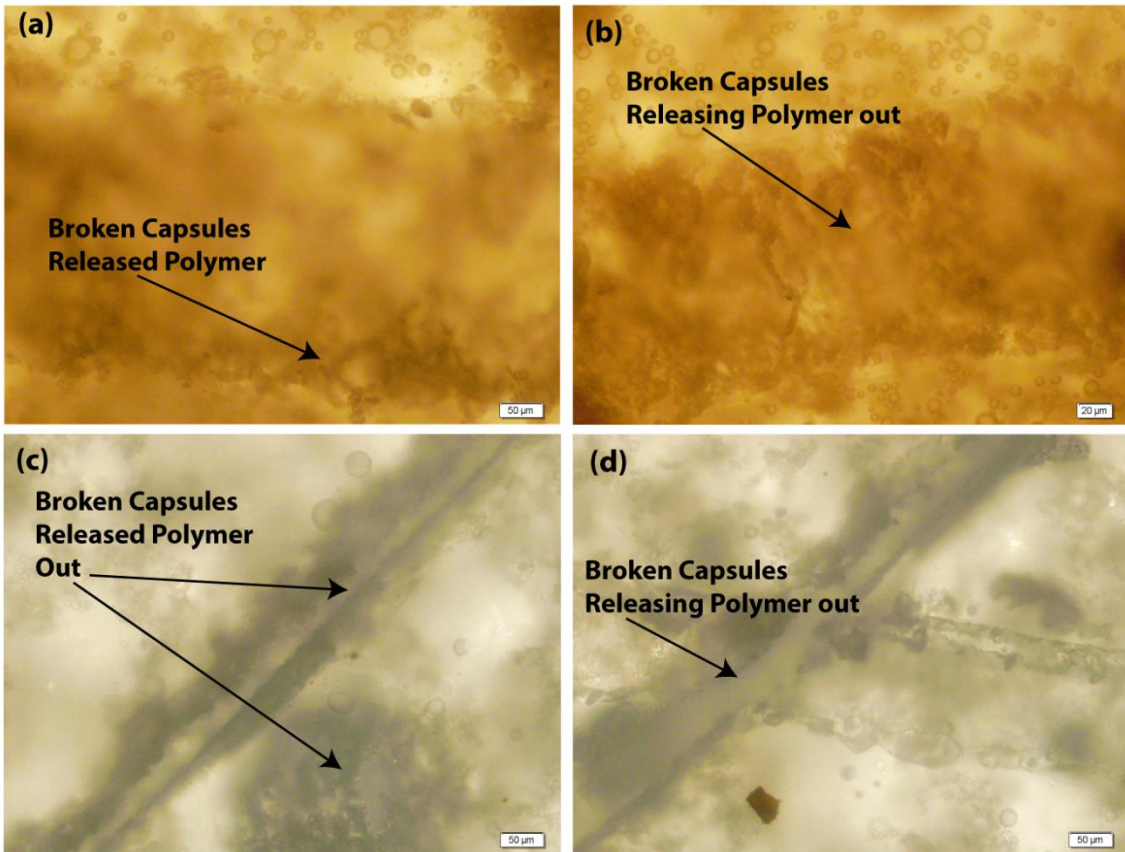

**Figure S7:** The LMC images of (a-b) EPX/ST-CC 50 and (c-d) EPX/EM-CC 50 microcapsules which loading into EPX thin composite coatings to confirm the releasing of encapsulated EPX after scratching with sharp object.
